# Supplementary material for: County-Level Longitudinal Clustering of COVID-19 Mortality to Incidence Ratio in the United States
Source: Research Square preprint supplement (doi:10.21203/rs.3.rs-40632/v2), 2020-12-01
Supplement: Supplementary file 1 [file 5374ff95449fa523ea4b0ae6.docx]

Response to reviewer: Green

Result updates for the 2nd & 3rd waves: Yellow

**Supplementary Materials**

**County-Level Longitudinal Clustering of COVID-19 Mortality to Incidence Ratio in the United States**

Nasim Vahabi1*, Masoud Salehi2*, Julio D. Duarte3, Abolfazl Mollalo4, George Michailidis1**

1. Informatics Institute, University of Florida, Gainesville, FL, USA
2. Department of Biostatistics, College of Public Health, Iran University of Medical Sciences, Tehran, Iran
3. Center for Pharmacogenomics, Department of Pharmacotherapy and Translational Research, College of Pharmacy, University of Florida, Gainesville, FL, USA
4. Department of Public Health and Prevention Sciences, School of Health Sciences, Baldwin Wallace University, Berea, OH, USA

*: Co-first author

**: Correspondence author

[gmichail@ufl.edu](mailto:gmichail@ufl.edu)

**SUPPLEMENTARY LITERATURE REVIEW**

**Comorbidities:**

**Chronic lung diseases, CLD:** COVID-19 is an acute respiratory disease that primarily affects the pulmonary alveolar epithelial cells, which can lead to respiratory failure and death1. There are different hypotheses about whether people with pre-existing CLD (especially chronic obstructive pulmonary disease, COPD) would be at higher risk of infection with the SARS-CoV-2 virus representing more severe symptoms than others.

Halpin et al. showed that the CLD prevalence among COVID-19 cases was less than the estimated prevalence in the general population2. In a study from Italy (March 23, 2020), COPD was not reported for any of the patients who died from COVID-19 (n=355, mean-age=79.5)3. Similarly, in data in the USA (March 31, 2020), chronic respiratory diseases were comorbidities in 8.5% of patients with COVID-19, compared to the GBD estimate of 11.3% for the same disease4. Halpin et al. have discussed three of the possible factors leading to the lower prevalence of COPD (and Asthma) in COVID-19 patients2.

There are also a number of published studies showing the synergistic effect of CLD in worsening the severity of COVID-19. Guan et al. reported more than 50% of chronic pulmonary disease for COVID-19 patients who were also admitted to ICU5. In a meta-analysis study on both Chinese- and English-language published articles, Zhao et al. showed that pre-existing COPD was significantly associated with a nearly 4-fold higher risk of developing severe COVID-19. The association remained significant in the subgroup of patients with death or ICU-required patients6. Moreover, in large case-series, they reported a higher prevalence of COPD in patients with severe presentation and worse outcomes7. In another meta-analysis (May 1, 2020), the reported prevalence of COPD patients was 2% in COVID-19 cases. They showed that although the COPD prevalence was low, it was significantly associated with a higher risk of more severe COVID-19 (63%), and higher mortality (60%)8. Brake et al. reported higher (upregulated) expression of the angiotensin-converting enzyme 2 (ACE2) in resected lung tissue from COPD patients compared to those with healthy lung function9. Some published evidence also indicates higher ACE2 expression in smokers compared to never smokers, which suggests that smokers can be more susceptible to infection by the SARS-CoV-2 virus9, 10.

It is necessary to put all these findings into context and consider that people with CLD, especially past or current smokers are more likely to have immune dysregulation. Therefore, these groups of people can be at higher risk of developing more severe symptoms out of a simple upper respiratory infection (similar to Bhat et al. suggestion11).

**Cardiovascular disease, CVD:** In addition to respiratory complications, published studies are showing the impact of pre-exist CVDs on developing COVID-19 and on worsening its severity and clinical outcomes. Hendren et al. showed that COVID-19 might cause myocarditis-like syndrome and acute myocardial injury associated with reduced left ventricular ejection fraction (LVEF), which can also be complicated by heart failure12. A different analysis in China showed that 8%-20% of the patients hospitalized with COVID-19 had abnormal cardiac troponin I (cTnI) who were also older and had more comorbid diseases13, 14. There are also published literature (not fully proven though) showing that SARS-CoV-2 can infect fibroblasts and cardiomyocytes via the ACE2-pathway causing myocardial injury15-19. Moreover, it is shown that patients with viral myocarditis, which commonly follows with chest pain can mimic a ventricular arrhythmia or coronary syndrome20, 21. Historically, researches have shown a significant increase in mortality for SARS patients with pre-existing CVD22-27.

**Diabetes mellitus, DM:** Historically, DM has been reported as a significant risk factor for higher mortality in patients infected with SARS-coronavirus, MERS-CoV, and H1N128-31. The DM prevalence among COVID-19 cases is reported higher than the estimated national prevalence2.

Most of the published studies have shown a significant association between DM and increased COVID-19 disease severity and MR. For example, in a meta-analysis by Jain and Yuan to estimate the effect of a set of comorbidities on COVID-19 severity in China (March 16, 2020), they showed that diabetes (16.8%) and hypertensive heart disease (25.4%) were the most prevalent comorbidities in confirmed cases32. In data from Italy, diabetes was reported in 20.3% of COVID-19 deaths2, 3. Moreover, different studies in China showed a higher prevalence of DM among patients with more severe COVID-197, 33, 34.

Pal et al. and Guo et al. discussed few explanations for the association between pre-existing DM and COVID-19 disease severity, including innate immunity and exaggerated proinflammatory cytokine response, notably interleukin (IL)-1, IL-6 and tumor necrosis factor (TNF)-a35-39. They also mentioned the plausible role of ACE2 in the association between DM and COVID-19 since it plays an essential anti-inflammatory and anti-oxidant role protecting the lung against ARDS40, as it is proven for 2014 H5N1 infection41. Furthermore, the reduced expression of ACE2 has been reported for COVID-19 patients with pre-exist DM, possibly due to glycosylation40-42.

There are few studies suggesting the idea of the potential role of DPP4 inhibition in COVID-19- patients with pre-existing DM. DPP4 enzyme is a transmembrane glycoprotein, expressed in the immune cells and plays a vital role in glucose/insulin metabolism, and can potentially increase the inflammation in DM individuals via both catalytic and noncatalytic mechanisms. Therefore, they discussed the possibility of DPP4 as a potential target to prevent and/or reduce the risk of respiratory complications that may add to the COVID-19 infection43-47. In contrast, studies are reporting a non-significant effect of pre-existing DM on COVID-19 disease severity48.

**Chronic liver disease:** The mechanism of COVID-19 in liver disease development remains poorly understood. Therefore, there are not many studies discussing the association between pre-existing liver disease and COVID-19 occurrence and or severity. In a study in Shanghai, China, about 51% of COVID-19 patients had abnormal liver function (LF). Of those, about 30% had pre-existing liver disease, including chronic hepatitis B and C49. In contrast, Chen et al. reported a similar rate of abnormal LF for both groups of COVID-19 patients with and without pre-existing liver disease in Wuhan, China50. There are also hypotheses regarding the connection between ACE2 and intestinal inflammation as a cause of experiencing diarrhea in COVID-19 patients, although its viability is not confirmed yet51-53.

**Demographic & Social Factors:**

**Age:** People of 65 years of age and older are at significantly higher risk of experiencing COVID-19 or for hospitalization and death, especially if they have pre-existing comorbidities such as CVD, DM, CLD, Hypertensive heart disease, and obesity54, 55. Ferguson et al. reported that 27%-71% of patients older than 60 years needed especial care in an ICU with an infection fatality rate of about 2%-9.5%56, 57. Stang et al. discussed a probable bias in age-significance in COVID-19 patients due to overestimation caused by the limited testing capacity to more symptomatic patients. They showed that the fatality rate from COVID-19 started increasing after age 60 years in Italy, Spain, and the USA (as of April 20, 2020)58, 59. There is also a study on children with a median age of 7 years in China (April 1, 2020) in which most of the cases were male (not significant though) with mild symptoms60.

Although, there is still not enough evidence and/or data to confirm whether this increase in mortality is directly related to age or other comorbidities that are not considered yet in the analysis.

**Gender:** Most evidence suggests that men are infected at a higher rate than women by COVID-19 and exhibit a higher mortality rate. However, most studies showed no significant differences in infection and mortality between men and women COVID-19 cases1, 61. Wenham et al. indicated that although an equal number of male and female COVID-19 cases was observed, there seem to be different MR by gender. They also suggested that women can be in high risk of getting infected, since they have more front-line interaction with communities, and provide more informal care within families besides their physical and cultural differences62, 63.

Further, selected studies report significantly different gender-distributions between male and female COVID-19 cases. For example, Zhao Y et al., using single-cell data, reported that ACE2 was upregulated in Asian males compared to women and other ethnicities which may lead to more severe incidents of COVID-1910, 64, 65.

**Smoking status:** Historically, smokers are at higher risk of getting respiratory complications (such as influenza and tuberculosis) besides pulmonary infections, due to lung-damage caused by smoking65-68. Many publications reported a significant relationship between smoking-status and COVID-19 prevalence and disease severity6, 7, 9, 64, 69, 70. Specifically, Zhao Q et al. showed 2-fold increase in COVID-19 severity for smokers6. Alqahtani et al. reported about 1.5-fold increase in COVID-19 severity and 40% higher MR for current-smokers8. Wang et al. and Zhao Y, et al. showed upregulation of ACE2 in smokers compared to non-smoker COVID-19 patients10, 64, 71. However, it should also be considered that most of the COVID-19 related studies are from China that exhibits a high rate of male-smokers, especially in rural areas (about 50%)9, 69. In contrast, some studies did not confirm a significant association between smoking-status and COVID-19 disease severity72.

In summary, most of the deaths from COVID-19 were in male-smokers from older age groups and those with underlying conditions such as chronic respiratory disease, cancer, hypertensive heart disease, diabetes, or cardiovascular disease.

**Environmental Factors:**

**Temperature & Humidity:** Data from the early stage of the outbreak in China (during winter) mostly showed that a higher temperature was associated with lower COVID-19 incidence73-76. Wang J et al. (March 9, 2020) and Qi et al. (April 19, 2020), reported reduced transmission of COVID-19 in higher temperature and humidity73, 77, 78.

On the other hand, Juni et al. (January 1, 2020), and Sobur et al. (March 28, 2020) did not confirm any significant relationship between daily temperature and COVID-19 incidence79, 80. s

**Air pollution:** Exposure to air pollution and particulate matter (PM) can have a positive association with increased risk of certain viral respiratory diseases such as influenza and SARS pandemic 2003. Studies are showing that exposure to PM increased the MR from 2009 H1N1 and Spanish influenza81-84. Air pollution is also linked to cellular damage, inflammation, CVD, and CLD, which are potential comorbidities associated with COVID-19 severity81, 85-87. Ye et al. showed that air pollution could also play a role in infectious disease transmission, although it has not been studied for COVID-19 as of May 15, 202088.

Wu et al. and Mollalo et al., in nationwide studies in the USA, showed that exposure to PM increased COVID-19 mortality and severity81, 89, 90. Setti et al. reported a significant relationship between PM and experiencing COVID-19 in Italy (January 1, 2020)91.

Several studies did not confirm the association between air pollution and COVID-19 severity, mortality, and transmission. However, they agreed that since exposure to air pollution and PM has a link with other complications, there can be a risk factor in increasing COVID-19 MR and disease severity50, 92-94.

**Table S1.** Descriptive statistics of comorbidities & disorders, demographics & social factors, and environmental factors, across the contiguous United States (2018-2019)

|  | **Variable** | **Mean±SD or %(N)** | **Min (county, state)** | **Max (county, state)** | **Description** | **Source** |
| --- | --- | --- | --- | --- | --- | --- |
|  | Diabetes | 10.5±3.5 | 2.2 (Teton, WY) | 28.7 (Jackson, AR) | Mortality rates from comorbidities and disorders in 100,000 population | US Diabetes Surveillance System, USDSS (<https://gis.cdc.gov/grasp/diabetes/diabetesatlas.html>) |
| **Comorbidities & Disorders**  (MR in 100,000 population) | CVD | 278±51.6 | 76 (Pitkin, CO) | 545.2 (Franklin Parish, LA) | USAFacts (usafacts.org) |
| Cardiomyopathy  & myocarditis | 7.90±3.07 | 2.40 (Kings, NY) | 34.7 (La Salle Parish, LA) |
| Hypertensive heart disease | 10.2±7.84 | 1.64 (Summit, CO) | 113.87 (Panola, MS) |
| Peripheral vascular disease | 2.68±1.23 | 0.8 (Queens, NY) | 23.11 (McKean, PA) |
| Atrial fibrillation | 7.5 ±1.84 | 1.67 (Kings, NY) | 44.02 (Carroll, MO) |
| Cerebrovascular disease | 53.4±11.33 | 14.50 (Summit, CO) | 134.64 (Angelina, TX) |
| Hepatitis | 0.22±0.16 | 0.06 (Lincoln, SD) | 5.24 (Union, FL) |
| HIV/AIDS | 1.3±1.93 | 0.15 (St. Croix, WI) | 64.8 (Union, FL) |
| TB | 0.2±0.16 | 0.06 (Daggett, UT) | 3.51 (Oglala Lakota, SD) |
| Lower respiratory infection | 30.35±10.14 | 7.0 (Collier, FL) | 87.7 (East Feliciana Parish, LA) |
| Interstitial lung disease  & pulmonary sarcoidosis | 5.56 ±1.10 | 2.75 (Kings, NY) | 14.93 (Oglala Lakota, SD) |
| Asthma | 1.25±0.38 | 0.49 (Newport, RI) | 4.12 (Holmes, MS) |
| COPD | 55.6±16.14 | 9.90 (Summit, CO) | 152.29 (Magoffin, KY) |
| Ischemia | 174.3±47.17 | 34.50 (Pitkin, CO) | 439.77 (Franklin Parish, LA) |
| Mesothelioma | 0.96±0.43 | 0.4 (Kings, NY) | 4.9 (Carlton, MN) |
| Tracheal cancer | 62.53±17.76 | 10.7 (Summit, CO) | 231.21 (Union, FL) |
| Leukemia | 9.55±0.77 | 4.17 (Summit, CO) | 16.55 (Union, FL) |
| Pancreatic cancer | 12.83±1.48 | 5 (Summit, CO) | 22.75 (Union, FL) |
| Rheumatic disease | 3.43±0.89 | 1.1 (Queens, NY) | 8.9 (Lowndes, AL) |
| Drug use disorder | 9.9±6.07 | 1.62 (Sioux, IA) | 57.15 (Rio Arriba, NM) |
| Alcohol use disorder | 2.9±2.22 | 0.63 (Hidalgo, TX) | 38.8 (Todd, SD) |
| **Demographics & Social**  (Frequency in total population) | Age (year) | 38.2±7.9 | 28.08 (Chattahoochee, GA) | 60.56 (Sumter, FL) | Median age in years | US Census Bureau Population Estimates, 2018 (census.gov) |
| Female-AA% | 0.09% (0.15) | 0.00% (Wibaux, MT) | 0.87% (Claiborne, MS) | Percentage of female African American |
| Female-WA% | 0.85% (0.16) | 0.51% (Oglala Lakota, SD) | 0.99% (Garfield, NE) | Percentage of female white American |
| Male-AA% | 0.09% (0.14) | 0.00% (Alpine, CA) | 0.85% (Claiborne, MS) | Percentage of male African American |
| Male-WA% | 0.85% (0.15) | 0.60% ((Oglala Lakota, SD) | 0.99% (McPherson, NE) | Percentage of male white American |
| Asian% | 1.4% (2.37) | 0.00% (King, TX) | 36.50% (Santa Clara, CA) | Percentage of Asian |
| Smokers% | 17.8% (3.6) | 7.00% (Utah, UT) | 41.00% (Oglala Lakota, SD) | Percentage of current smokers |
| Unemployed% | 5.2% (1.82) | 1.70% (Baca, CO) | 23.50% (Imperial, CA) | Percentage of unemployment | Bureau of Labor Statistics ([bls.gov](https://www.bls.gov/)) |
| Income rate | 4.52% (0.72) | 2.70% (Borden, TX) | 8.80% (Monroe, AL) | Ratio of household income at the 80th percentile to income at the 20th percentile | Small Area Income and Poverty Estimates, American Community Survey, five-year Estimates (census.gov) |
| Uninsured% | 12.0% (5.02) | 2.00% (Norfolk, MA) | 33.00% (Collingsworth, TX) | Percentage of uninsured | Small Area Health Insurance Estimates (census.gov) |
|  | Food insecurity | 14.2±4.2 | 3 (Grant, KS) | 38 (Jefferson, MS) | Food Environment Index (2018) | Map the Meal Gap  (<https://map.feedingamerica.org/>) |
| Fair/Poor health | 17.5±4.7 | 8 (Douglas, CO) | 41 (Starr, TX) | Percentage of adults that report fair or poor health (2018) | Behavioral Risk Factor Surveillance System, BRFSS  (<https://www.cdc.gov/brfss/>) |
| **Environmental** | Population density | 173.0±739.4 | 0.2 (Kings, NY) | 27154.2 (Loving, TX) | Population density per square miles | US Census Bureau Population Estimates, 2018 (census.gov) |
| AQI | 27.8±6.00 | 7.95 (Teton, WY) | 54.5 (Neosho, KS) | Air quality index | US Environmental Protection Agency, EPA ([epa.gov](https://www.epa.gov/)) |
| Temperature (°C) | 38.9±9.88 | 13.38 (Lake, MN) | 71.69 (Monroe, FL) | Weather (temperature) | National Oceanic and Atmospheric Administration, NOAA ([noaa.gov](https://www.noaa.gov/)) |
| PM ( | 6.8±1.56 | 1.77 (Teton, WY) | 17.15 (Neosho, KS) | Particulate matter 2.5 | US Environmental Protection Agency, EPA ([epa.gov](https://www.epa.gov/)) |

**Table S2.** **1st wave (March 25 – Jun 3, 2020).** Parameter estimates and fit indices for linear and quadratic LGMs using COVID-19 MIR. Estimated intercepts show the initial COVID-19 mortality to incidence (MIR) at the beginning of the wave on March 25. Estimated slopes indicate the COVID-19 growth trajectories (pattern) over time from March 25 to June 3, 2020, USA

| **Estimates/Fit** | **Parameter/Statistics** | **linear LGM** | **Non-linear LGM** | |
| --- | --- | --- | --- | --- |
| Mean (SE) | Mean (SE) | |
| **Estimate** | Intercept | 0.040 (0.004)* | 0.020 (0.030)* | |
|  | Slope | 0.025 (0.005)* | 0.110 (0.011)* | |
|  | Quadratic Slope** | *NA* | -0.075 (0.009)* | |
| **Factor Loading** |  | slope | slope | Quadratic Slope |
|  | 1st | 0.00 | 0.00 | 0.00 |
|  | 2nd | 0.10 | 0.10 | 0.01 |
|  | 3rd | 0.20 | 0.20 | 0.04 |
|  | 4th | 0.30 | 0.30 | 0.09 |
|  | 5th | 0.40 | 0.40 | 0.16 |
|  | 6th | 0.50 | 0.50 | 0.25 |
|  | 7th | 0.60 | 0.60 | 0.36 |
|  | 8th | 0.70 | 0.70 | 0.49 |
|  | 9th | 0.80 | 0.80 | 0.64 |
|  | 10th | 0.90 | 0.90 | 0.81 |
|  | 11th | 1.00 | 1.00 | 1.00 |
| **Fit Index** | AIC | -50555.3 | -53369.9 | |
| * Significant with P-values less than 0.05. | | | | |

**Table S3.** **2nd wave (Jun 4 – Sep 2, 2020).** Parameter estimates and fit indices for linear and quadratic LGMs using COVID-19 MIR. Estimated intercepts show the initial COVID-19 mortality to incidence (MIR) at the beginning of the wave on Jun 4. Estimated slopes indicate the COVID-19 growth trajectories (pattern) over time from Jun 4 to Sep 2, 2020, USA

| **Estimates/Fit** | **Parameter/Statistics** | **linear LGM** | **Non-linear LGM** | |
| --- | --- | --- | --- | --- |
| Mean (SE) | Mean (SE) | |
| **Estimate** | Intercept | 0.029 (0.002)* | 0.036 (0.002)* | |
|  | Slope | -0.010 (0.005)* | -0.073 (0.007)* | |
|  | Quadratic Slope | *NA* | 0.090 (0.008)* | |
| **Factor Loading** |  | slope | slope | Quadratic Slope |
|  | 1st | 0.00 | 0.00 | 0.00 |
|  | 2nd | 0.10 | 0.10 | 0.01 |
|  | 3rd | 0.20 | 0.20 | 0.04 |
|  | 4th | 0.30 | 0.30 | 0.09 |
|  | 5th | 0.40 | 0.40 | 0.16 |
|  | 6th | 0.50 | 0.50 | 0.25 |
|  | 7th | 0.60 | 0.60 | 0.36 |
| **Fit Index** | AIC | -42524.4 | -43653.7 | |
| * Significant with P-values less than 0.05. | | | | |

**Table S4.** **3rd wave (Sep 3 – Nov 12, 2020).** Parameter estimates and fit indices for linear and quadratic LGMs using COVID-19 MIR. Estimated intercepts show the initial COVID-19 mortality to incidence (MIR) at the beginning of the wave on Sep 3. Estimated slopes indicate the COVID-19 growth trajectories (pattern) over time from Sep 3 to Nov 12, 2020, USA

| **Estimates/Fit** | **Parameter/Statistics** | **linear LGM** | **Non-linear LGM** | |
| --- | --- | --- | --- | --- |
| Mean (SE) | Mean (SE) | |
| **Estimate** | Intercept | 0.020 (0.001) | 0.020 (0.001) | |
|  | Slope | -0.012 (0.002) | -0.003 (0.004) | |
|  | Quadratic Slope | *NA* | -0.030 (0.011) | |
| **Factor Loading** |  | slope | slope | Quadratic Slope |
|  | 1st | 0.0 | 0.0 | 0.00 |
|  | 2nd | 0.1 | 0.1 | 0.01 |
|  | 3rd | 0.2 | 0.2 | 0.04 |
|  | 4th | 0.3 | 0.3 | 0.09 |
| **Fit Index** | AIC | -23336.8 | -23764.6 | |
| * Significant with P-values less than 0.05. | | | | |

**Table S5.** The goodness of fit indices for the latent growth mixture models (LGMMs) to find the optimal number of the clusters based on the COVID-19 MIR in each wave. 1st wave (March 25 – Jun 3, 2020) includes 1736 counties (with MIR>0), 2nd wave (Jun 4 - Sep 2, 2020) includes 1188 counties (with MIR>0) in the sunbelt region, and 3rd wave (Sep 3 – Nov 12, 2020) includes 944 counties (with MIR>0) in the great plains region, USA

| **Wave** | **Model** | **Cluster Sample-size*** | **AIC** | **BLRT P-value** |
| --- | --- | --- | --- | --- |
| **1st** | 1 cluster | 1736 | -54871.4 | *NA* |
| 2 cluster | (225, 1511)* | -58691.2 | < 0.001 |
| 3 cluster | (93, 127, 1516) | -59237.4 | < 0.001 |
| 4 cluster | (193, 80, 7, 1289) | -60294.9 | < 0.001 |
| 5 cluster | (9, 1181, 207, 268, 71) | -61555.3 | < 0.001 |
| 6 cluster | (26, 28, 1372, 101, 5, 207) | -63502.5 | < 0.001 |
| 7 cluster | (1094, 6, 102, 374, 5, 30, 125) | -64010.5 | 0.001 |
| **8 cluster** | **(52, 74, 66, 39, 1406, 64, 12, 23)** | **-64292.3** | **0.010** |
| 9 cluster | (5, 61, 1209, 10, 201, 37, 93, 12, 108) | -64901.8 | 0.091 |
| **2nd** | 1 cluster | 1344 | 44928.1 | *NA* |
| 2 cluster | (1129,59) | -46180.0 | < 0.001 |
| 3 cluster | (53, 1046, 89) | -47810.9 | < 0.001 |
| 4 cluster | (33, 72, 1057, 26) | -48706.1 | < 0.001 |
| 5 cluster | **(32, 1035, 43, 59, 19)** | -49787.7 | < 0.001 |
| 6 cluster | (43, 60, 3, 1030, 19, 33) | -50113.3 | < 0.001 |
| **3rd** | 1 cluster | 1055 | -17113.9 | *NA* |
| 2 cluster | (187, 757) | -18259.5 | < 0.001 |
| 3 cluster | (759, 148, 37) | -18534.6 | < 0.001 |
| 4 cluster | (125, 47, 11, 761) | -24913.5 | < 0.001 |
| 5 cluster | (75, 91, 18, 9, 751) | -18817.1 | < 0.001 |
| * Number of the counties in each cluster. For instance, (225, 1511) indicates: (Number of the counties in cluster1, Number of the counties in cluster2) in a 2-cluster model. | | | | |

To identify counties with similar COVID-19 MIR growth trajectories over time, we fitted a series of LGMMs with different cluster numbers (Table S3) for each wave.

In the **1st wave**, the BLRT suggested that each successive model above the 1-cluster model provided statistical improvement in the fit (e.g., a four-cluster model was better than a three-cluster one, which was better than a two-cluster model, etc.) up to a 9-cluster model (BLRT P-value<0.1). This result is consistent with the information criteria as well. The cluster sample sizes, however, suggested that models with 8 clusters had an adequate cluster sample size (>1% population in each cluster). Therefore, an 8-cluster non-linear LGMM was selected as the best model to find clusters of the U.S. counties.

In the **2nd wave**, the BLRT showed that each successive model above the 1-cluster model provided statistical improvement in the fit up to a 6-cluster model. This result consistent with the information criteria as well. The cluster sample size, however, suggested that models with 5 clusters had an adequate cluster sample size (>1% population in each cluster). Therefore, a 5-cluster non-linear LGMM was selected as the best model to find clusters of the U.S. counties in the sunbelt region during the 2nd wave (Jun 4 to Sep 2, 2020).

In the **3rd wave**, both information criteria and cluster sample size suggested that each successive model above the 1-cluster model provided statistical improvement in the fit up to a 4 model. Therefore, a 4-cluster non-linear LGMM was selected as the best model to find clusters of the U.S. counties in the great plains region during the 3rd wave (Sep 3 to Nov 12, 2020).

**Table S6. GLMM clustering results**. Clustering (based on COVID-19 MIR>0) of the 1736 counties during the 1st wave (March 25 – Jun 3, 2020), 1344 targeted counties (sunbelt region) during the 2nd wave (Jun 4 - Sep 2, 2020), and 1055 targeted counties (great plains region) during the 3rd wave (Sep 3 – Nov 12, 2020), USA (as a complementary for Table 4)

| **Wave** | **Cluster** | **Intercept*** | | **Slope**** | | **Factor Loadings** |
| --- | --- | --- | --- | --- | --- | --- |
| Mean (SE) | P-value | Mean (SE) | P-value | (March 25, April 1, April 8, April 15, April 22, April 29, May 6, May 13, May20, May 27, June 3) |
| **1st** | **0** | 0%(0%) | *NA* | 0% (0%) | *NA* | *NA* |
| **1** | 12.9%(3.1%) | <0.001 | -1.0%(0.6%) | 0.122 | 0, 5.13, 5.21, 3.97, 3.74, 3.65, 3.05, -0.61, -0.35, -0.31, -0.29 |
| **2** | 2.2%(0.8%) | 0.010 | 3.5%(1.0%) | <0.001 | 0, -0.38, 2.01, 2.55, 3.39, 3.68, 3.73, 3.55, 3.24, 0.12, 1.96 |
| **3** | 1.9%(0.9%) | 0.027 | 2.8%(0.4%) | <0.001 | 0, -0.42, 1.78, 6.49, 7.33, 4.66, 3.50, 2.46, 1.97, 0.09, 1.34 |
| **4** | 0.9%(0.5%) | 0.089 | 2.0%(0.4%) | <0.001 | 0, -0.09, -0.18, -0.16, -0.16, -0.19, -0.18, -0.24, -5.23, 3.07, -4.83 |
| **5** | 1.0%(0.3%) | <0.001 | -3.0%(0.5%) | <0.001 | 0, -0.13, -0.41, -0.60, -0.80, -1.00, -1.14, -1.17, -1.21, -1.16 |
| **6** | 9.8%(3.0%) | 0.001 | 3.4%(0.7%) | <0.001 | 0, 7.78, 2.76, 0.84, -0.09, -0.30, -0.45, -0.51, -0.59, -0.54, -0.62 |
| **7** | 1.5%(1.3%) | 0.236 | -3.1%(0.5%) | <0.001 | 0, 0.07, 0.06, 0.06, -0.68, -8.05, -4.23, -3.97, -3.59, -3.24, -3.31 |
| **8** | 1.9%(1.3%) | 0.127 | -4.2%(0.0%) | *NA* | 0, 0.13, 0.15, 0.03, -0.04, -0.06, -3.97, -3.21, -2.56, -2.34, -1.97 |
|  | **Cluster** | **Intercept** | | **Slope** | | **Factor Loadings**  (Jun 4, Jun 18, Jul 2, Jul 16, Jul 30, Aug 13, Aug 27) |
| Mean (SE) | P-value | Mean (SE) | P-value |
| **2nd** | **0** | 0%(0%) | NA | 0%(0%) | *NA* | *NA* |
| **1** | 1.5%(0.3%) | <0.001 | 10.6%(4.5%) | 0.155 | 0, -0.07, -0.08, -0.08, 0.45, 0.42, 0.31 |
| **2** | 3.0%(0.2%) | <0.001 | 12.5%(4.3%) | 0.0014 | 0, -0.02, -0.05, -0.08, -0.09, -0.09, -0.09 |
| **3** | 10.6%(1.8%) | <0.001 | 20.7%(12.7%) | 0.102 | 0, 0.05, 0.05, -0.07, -0.11, -0.12, -0.12 |
| **4** | 1.8%(0.3%) | <0.001 | 16.3%(6.5%) | 0.012 | 0, -0.07, -0.07, -0.07, -0.04, 0.11, 0.09 |
| **5** | 14.1%(4.5%) | <0.001 | 74.7%(0.0%) | *NA* | 0, 0.01, -0.10, -0.12, -0.13, -0.13, -0.13 |
|  | **Cluster** | **Intercept** | | **Slope** | | **Factor Loadings**  (Sep 3, Sep 17, Oct 15, Nov 12) |
| Mean (SE) | P-value | Mean (SE) | P-value |
| **3rd** | **0** | 0%(0%) | *NA* | 0%(0%) | *NA* | *NA* |
| **1** | 5.2%(0.2%) | <0.001 | -3.7%(0.5%) | <0.001 | 0, 0.02, 0.19, 0.41 |
| **2** | 1.0%(0.6%) | 0.082 | 3.1%(1.8%) | 0.088 | 0, 0.04, 0.68, 0.47 |
| **3** | 3.5%(1.1%) | 0.002 | -20.0%(3.2%) | <0.001 | 0, -0.20, -0.15, -0.01 |
| **4** | 1.4% (0.1%) | <0.001 | -0.9%(0.3%) | 0.001 | 0, 0.11, 0.20, 0.30 |
| * Intercept indicates the estimated mean COVID-19 MIR at the beginning of the study on March 25, 2020, for each cluster.  ** Slope indicates the overall change of COVID-19 MIR over the study time, for each cluster. | | | | | | |

**Table S7. 1st Wave (March 25 to June 3, 2020, USA):** estimation of COVID-19 MIR and the rank of each cluster based on these rates. Estimations are based on the LGMM with 8 cluster

| **Cluster Number** | COVID-19 MIR on March 25 | Cluster Rank  (March 25) | Change in COVID-19 MIR  During the 1st wave | COVID-19 MIR on June 3 | Cluster Rank  (June 3) |
| --- | --- | --- | --- | --- | --- |
| **1** | 12.9% | 1* | 0.3% ↑ | 13.2% | 1 |
| **2** | 2.2% | 3 | 6.9% ↑ | 9.1% | 5 |
| **3** | 1.9% | 4 | 3.7% ↑ | 5.6% | 7 |
| **4** | 0.8% | 7 | 9.7% ↑ | 10.5% | 3 |
| **5** | 1.0% | 6 | 3.5% ↑ | 4.5% | 8 |
| **6** | 9.8% | 2 | 2.1% ↓ | 7.7% | 6 |
| **7** | 1.5% | 5 | **10.1% ↑** | 11.6% | 2 |
| **8** | 1.9% | 4 | 8.3%↑ | 10.2% | 4 |
| * Rank #1 means the worst cluster with the highest COVID-19 MIR. | | | | | |

**Table S8. 2nd wave (Jun 4 to Sep 2, 2020, USA):** estimation of COVID-19 MIR and the rank of each cluster based on these rates. Estimations are based on the LGMM with 5 cluster

| **Cluster Number** | COVID-19 MIR on Jun 4 | Cluster Rank  (Jun 4) | Change in COVID-19 MIR  During the 2nd wave | COVID-19 MIR on Sep 2 | Cluster Rank  (Sep 2) |
| --- | --- | --- | --- | --- | --- |
| **1** | 1.5% | 5 | **3.3% ↑** | 4.8% | 2 |
| **2** | 3.0% | 3 | 1.2% ↓ | 1.8% | 5 |
| **3** | 10.6% | 2 | 2.6% ↓ | 8.0% | 1 |
| **4** | 1.8% | 4 | 1.5% ↑ | 3.3% | 4 |
| **5** | 14.1% | 1 | 10.1% ↓ | 4.0% | 3 |
| * Rank #1 means the worst cluster with the highest COVID-19 MIR. | | | | | |

**Table S9. 3rd wave (Sep 3 - Nov 12, 2020, USA):** estimation of COVID-19 MIR and the rank of each cluster based on these rates. Estimations are based on the LGMM with 4 cluster

| **Cluster Number** | COVID-19 MIR on Sep 3 | Cluster Rank  (Sep 3) | Change in COVID-19 MIR  During the 3rd wave | COVID-19 MIR on Nov 12 | Cluster Rank  (Nov 12) |
| --- | --- | --- | --- | --- | --- |
| **1** | 5.2% | 1 | 1.6% ↓ | 3.6% | 2 |
| **2** | 1.0% | 4 | **1.5% ↑** | 2.5% | 3 |
| **3** | 3.5% | 2 | 0.3% ↑ | 3.8% | 1 |
| **4** | 1.4% | 3 | 0.2% ↓ | 1.2% | 4 |
| * Rank #1 means the worst cluster with the highest COVID-19 MIR. | | | | | |

**Table S10.** **1st Wave (March 25 to June 3, 2020, USA):** results from multinomial logit model for all clusters. The estimated odds ratios (ORs) show the association of each risk factor with increasing/decreasing the relative log odds of being in each cluster compare to cluster 0 (MIR=0)

|  | **Variable** | **cluster** | **Est.** | **SD** | **OR** | **P-value** |
| --- | --- | --- | --- | --- | --- | --- |
| **Comorbidities & Disorders** | CVD | 1 | 0.025 | 0.062 | 1.025 | 0.689 |
|  | 2 | -0.085 | 0.058 | 0.918 | 0.140 |
|  | 3 | -0.053 | 0.057 | 0.949 | 0.352 |
|  | 4 | -0.003 | 0.063 | 0.997 | 0.960 |
|  | 5 | 0.072 | 0.025 | 1.075 | **0.004** |
|  | 6 | 0.03 | 0.052 | 1.03 | 0.561 |
|  | 7 | -0.285 | 0.135 | 0.752 | **0.035** |
|  | 8 | -0.072 | 0.072 | 0.93 | 0.316 |
| Cardiomyopathy & myocarditis | 1 | 0.003 | 0.089 | 1.003 | 0.974 |
|  | 2 | 0.079 | 0.079 | 1.082 | 0.318 |
|  | 3 | 0.081 | 0.075 | 1.084 | 0.282 |
|  | 4 | 0.117 | 0.08 | 1.124 | 0.142 |
|  | 5 | -0.001 | 0.035 | 0.999 | 0.980 |
|  | 6 | -0.052 | 0.073 | 0.949 | 0.475 |
|  | 7 | 0.1 | 0.212 | 1.105 | 0.639 |
|  | 8 | 0.18 | 0.093 | 1.198 | 0.053 |
| Hypertensive heart disease | 1 | 0.015 | 0.064 | 1.015 | 0.818 |
|  | 2 | 0.092 | 0.06 | 1.097 | 0.126 |
|  | 3 | 0.066 | 0.059 | 1.068 | 0.268 |
|  | 4 | 0.023 | 0.068 | 1.024 | 0.732 |
|  | 5 | -0.02 | 0.027 | 0.98 | 0.452 |
|  | 6 | 0.009 | 0.054 | 1.009 | 0.864 |
|  | 7 | 0.314 | 0.14 | 1.369 | **0.025** |
|  | 8 | 0.121 | 0.076 | 1.129 | 0.110 |
| Peripheral vascular disease | 1 | 0.227 | 0.148 | 1.255 | 0.126 |
|  | 2 | 0.183 | 0.212 | 1.201 | 0.389 |
|  | 3 | 0.235 | 0.175 | 1.264 | 0.181 |
|  | 4 | 0.024 | 0.276 | 1.025 | 0.93 |
|  | 5 | -0.704 | 0.123 | 0.495 | **<0.001** |
|  | 6 | 0.212 | 0.138 | 1.236 | 0.125 |
|  | 7 | 0.499 | 0.471 | 1.648 | 0.289 |
|  | 8 | -0.148 | 0.359 | 0.863 | 0.681 |
| Atrial fibrillation | 1 | 0.028 | 0.09 | 1.028 | 0.759 |
|  | 2 | 0.044 | 0.111 | 1.045 | 0.689 |
|  | 3 | 0.025 | 0.111 | 1.025 | 0.823 |
|  | 4 | -0.063 | 0.124 | 0.939 | 0.608 |
|  | 5 | -0.202 | 0.05 | 0.817 | **<0.001** |
|  | 6 | -0.043 | 0.102 | 0.958 | 0.676 |
|  | 7 | 0.286 | 0.26 | 1.331 | 0.271 |
|  | 8 | 0.121 | 0.119 | 1.128 | 0.309 |
| Cerebrovascular | 1 | -0.05 | 0.067 | 0.951 | 0.453 |
|  | 2 | 0.089 | 0.061 | 1.093 | 0.145 |
|  | 3 | 0.065 | 0.06 | 1.067 | 0.274 |
|  | 4 | -0.001 | 0.068 | 0.999 | 0.994 |
|  | 5 | -0.09 | 0.027 | 0.914 | **0.001** |
|  | 6 | -0.034 | 0.055 | 0.966 | 0.532 |
|  | 7 | 0.309 | 0.14 | 1.362 | **0.027** |
|  | 8 | 0.08 | 0.077 | 1.083 | 0.298 |
| Diabetes | 1 | 0.046 | 0.044 | 1.047 | 0.293 |
|  | 2 | 0.015 | 0.041 | 1.015 | 0.715 |
|  | 3 | -0.021 | 0.041 | 0.979 | 0.606 |
|  | 4 | 0.103 | 0.044 | 1.108 | **0.019** |
|  | 5 | 0.018 | 0.019 | 1.018 | 0.351 |
|  | 6 | -0.053 | 0.041 | 0.948 | 0.197 |
|  | 7 | 0.026 | 0.07 | 1.026 | 0.714 |
|  | 8 | -0.019 | 0.056 | 0.982 | 0.741 |
| Hepatitis | 1 | -1.147 | 0.097 | 0.318 | **<0.001** |
|  | 2 | 0.727 | 0.098 | 2.069 | **<0.001** |
|  | 3 | -0.595 | 0.12 | 0.552 | **<0.001** |
|  | 4 | 1.575 | 0.165 | 4.831 | **<0.001** |
|  | 5 | 2.368 | 0.621 | 10.678 | **<0.001** |
|  | 6 | -1.89 | 0.078 | 0.151 | **<0.001** |
|  | 7 | 0.089 | 0.019 | 1.093 | **<0.001** |
|  | 8 | 0.455 | 0.093 | 1.576 | **<0.001** |
| HIV/AIDS | 1 | 0.157 | 0.207 | 1.17 | 0.448 |
|  | 2 | -0.044 | 0.169 | 0.957 | 0.793 |
|  | 3 | -0.019 | 0.158 | 0.981 | 0.903 |
|  | 4 | 0.022 | 0.217 | 1.023 | 0.918 |
|  | 5 | 0.044 | 0.101 | 1.045 | 0.663 |
|  | 6 | 0.188 | 0.14 | 1.207 | 0.177 |
|  | 7 | 0.082 | 0.384 | 1.086 | 0.831 |
|  | 8 | -0.004 | 0.305 | 0.996 | 0.990 |
| Tuberculosis | 1 | -0.369 | 0.071 | 0.691 | **<0.001** |
|  | 2 | 0.043 | 0.072 | 1.044 | 0.549 |
|  | 3 | 0.848 | 0.075 | 2.335 | **<0.001** |
|  | 4 | -0.541 | 0.041 | 0.582 | **<0.001** |
|  | 5 | 0.135 | 0.64 | 1.145 | 0.832 |
|  | 6 | 0.275 | 0.1 | 1.317 | **0.006** |
|  | 7 | 0.442 | 0.042 | 1.555 | **<0.001** |
|  | 8 | 0.225 | 0.226 | 1.253 | 0.319 |
| Lower respiratory infection | 1 | -0.075 | 0.024 | 0.928 | **0.002** |
|  | 2 | -0.017 | 0.018 | 0.983 | 0.351 |
|  | 3 | 0.001 | 0.017 | 1.001 | 0.968 |
|  | 4 | -0.016 | 0.021 | 0.984 | 0.427 |
|  | 5 | -0.012 | 0.008 | 0.988 | 0.130 |
|  | 6 | -0.011 | 0.017 | 0.989 | 0.527 |
|  | 7 | 0.016 | 0.032 | 1.016 | 0.614 |
|  | 8 | 0.031 | 0.019 | 1.032 | 0.097 |
| Interstitial lung disease & pulmonary sarcoidosis | 1 | -0.256 | 0.17 | 0.774 | 0.133 |
|  | 2 | -0.042 | 0.134 | 0.959 | 0.751 |
|  | 3 | -0.044 | 0.132 | 0.957 | 0.737 |
|  | 4 | -0.182 | 0.164 | 0.833 | 0.268 |
|  | 5 | 0.102 | 0.062 | 1.108 | 0.102 |
|  | 6 | 0.116 | 0.123 | 1.124 | 0.344 |
|  | 7 | -0.038 | 0.28 | 0.962 | 0.891 |
|  | 8 | 0.069 | 0.167 | 1.072 | 0.677 |
| Ischemia | 1 | -0.025 | 0.061 | 0.975 | 0.683 |
|  | 2 | 0.086 | 0.057 | 1.09 | 0.133 |
|  | 3 | 0.045 | 0.057 | 1.046 | 0.432 |
|  | 4 | 0.002 | 0.063 | 1.002 | 0.971 |
|  | 5 | -0.073 | 0.025 | 0.93 | **0.004** |
|  | 6 | -0.031 | 0.052 | 0.97 | 0.553 |
|  | 7 | 0.277 | 0.135 | 1.319 | **0.041** |
|  | 8 | 0.074 | 0.072 | 1.077 | 0.302 |
| Mesothelioma | 1 | -1.616 | 0.766 | 0.199 | **0.035** |
|  | 2 | 0.759 | 0.365 | 2.136 | **0.037** |
|  | 3 | 0.436 | 0.452 | 1.547 | 0.335 |
|  | 4 | 1.2 | 0.409 | 3.319 | **0.003** |
|  | 5 | -0.015 | 0.236 | 0.985 | 0.948 |
|  | 6 | -0.17 | 0.474 | 0.844 | 0.72 |
|  | 7 | -0.186 | 0.041 | 0.83 | **<0.001** |
|  | 8 | 1.298 | 0.407 | 3.66 | **0.001** |
| Tracheal cancer | 1 | 0.012 | 0.016 | 1.012 | 0.428 |
|  | 2 | -0.022 | 0.014 | 0.978 | 0.129 |
|  | 3 | 0.003 | 0.013 | 1.003 | 0.843 |
|  | 4 | 0.016 | 0.016 | 1.017 | 0.302 |
|  | 5 | 0.006 | 0.007 | 1.006 | 0.400 |
|  | 6 | 0.003 | 0.013 | 1.003 | 0.837 |
|  | 7 | 0 | 0.028 | 1 | 0.987 |
|  | 8 | -0.01 | 0.018 | 0.99 | 0.596 |
| Pancreatic cancer | 1 | 0.164 | 0.16 | 1.178 | 0.306 |
|  | 2 | 0.406 | 0.129 | 1.501 | **0.002** |
|  | 3 | 0.121 | 0.132 | 1.129 | 0.358 |
|  | 4 | -0.094 | 0.158 | 0.91 | 0.551 |
|  | 5 | 0.081 | 0.074 | 1.084 | 0.274 |
|  | 6 | 0.07 | 0.128 | 1.072 | 0.588 |
|  | 7 | 0.514 | 0.255 | 1.671 | **0.044** |
|  | 8 | -0.128 | 0.187 | 0.88 | 0.496 |
| Drug use disorder | 1 | 0.024 | 0.034 | 1.024 | 0.483 |
|  | 2 | 0.054 | 0.03 | 1.055 | 0.073 |
|  | 3 | 0.078 | 0.025 | 1.081 | **0.002** |
|  | 4 | -0.006 | 0.035 | 0.994 | 0.869 |
|  | 5 | 0.01 | 0.014 | 1.01 | 0.476 |
|  | 6 | 0.077 | 0.026 | 1.08 | **0.003** |
|  | 7 | 0.094 | 0.047 | 1.099 | **0.044** |
|  | 8 | 0.032 | 0.034 | 1.033 | 0.338 |
| Alcohol use disorder | 1 | -0.1 | 0.123 | 0.905 | 0.414 |
|  | 2 | -0.173 | 0.091 | 0.841 | 0.057 |
|  | 3 | -0.208 | 0.102 | 0.812 | **0.041** |
|  | 4 | -0.099 | 0.102 | 0.906 | 0.334 |
|  | 5 | -0.006 | 0.035 | 0.994 | 0.857 |
|  | 6 | -0.114 | 0.095 | 0.892 | 0.228 |
|  | 7 | -0.011 | 0.122 | 0.989 | 0.925 |
|  | 8 | -0.073 | 0.079 | 0.929 | 0.353 |
| **Demographics & Social** | Female-AA% | 1 | -0.29 | 0.215 | 0.749 | 0.177 |
|  | 2 | 0.722 | 0.207 | 2.058 | **<0.001** |
|  | 3 | 0.726 | 0.221 | 2.066 | **0.001** |
|  | 4 | 0.537 | 0.211 | 1.711 | **0.011** |
|  | 5 | 2.883 | 0.485 | 17.863 | **<0.001** |
|  | 6 | 1.096 | 0.218 | 2.991 | **<0.001** |
|  | 7 | -0.081 | 0.029 | 0.922 | **0.006** |
|  | 8 | -0.052 | 0.107 | 0.949 | 0.628 |
| Female-WA% | 1 | -1.543 | 0.492 | 0.214 | **0.002** |
|  | 2 | -2.746 | 0.434 | 0.064 | **<0.001** |
|  | 3 | -2.363 | 0.428 | 0.094 | **<0.001** |
|  | 4 | -1.27 | 0.46 | 0.281 | **0.006** |
|  | 5 | -2.227 | 0.251 | 0.108 | **<0.001** |
|  | 6 | -2.415 | 0.429 | 0.089 | **<0.001** |
|  | 7 | -0.769 | 0.049 | 0.463 | **<0.001** |
|  | 8 | -1.008 | 0.488 | 0.365 | **0.039** |
| Male-AA% | 1 | -0.178 | 0.209 | 0.837 | 0.393 |
|  | 2 | 0.939 | 0.198 | 2.557 | **<0.001** |
|  | 3 | 0.447 | 0.209 | 1.564 | **0.032** |
|  | 4 | 0.395 | 0.209 | 1.484 | 0.058 |
|  | 5 | 1.617 | 0.486 | 5.038 | **0.001** |
|  | 6 | 1.104 | 0.211 | 3.016 | **<0.001** |
|  | 7 | -0.18 | 0.029 | 0.835 | **<0.001** |
|  | 8 | -0.242 | 0.108 | 0.785 | **0.025** |
| Male-WA% | 1 | -1.682 | 0.486 | 0.186 | **0.001** |
|  | 2 | -2.944 | 0.424 | 0.053 | **<0.001** |
|  | 3 | -2.113 | 0.415 | 0.121 | **<0.001** |
|  | 4 | -1.176 | 0.456 | 0.309 | **0.01** |
|  | 5 | -0.976 | 0.256 | 0.377 | **<0.001** |
|  | 6 | -2.363 | 0.422 | 0.094 | **<0.001** |
|  | 7 | -0.662 | 0.049 | 0.516 | **<0.001** |
|  | 8 | -0.811 | 0.484 | 0.444 | 0.094 |
| Asian% | 1 | 0.248 | 0.152 | 1.281 | 0.103 |
|  | 2 | -0.582 | 0.277 | 0.559 | **0.036** |
|  | 3 | 0.042 | 0.163 | 1.043 | 0.796 |
|  | 4 | 0.267 | 0.14 | 1.306 | 0.057 |
|  | 5 | 0.254 | 0.073 | 1.289 | **0.001** |
|  | 6 | 0.049 | 0.162 | 1.051 | 0.761 |
|  | 7 | 0.248 | 0.238 | 1.281 | 0.298 |
|  | 8 | -0.206 | 0.306 | 0.814 | 0.502 |
| Smokers% | 1 | 0.022 | 0.083 | 1.022 | 0.790 |
|  | 2 | 0.095 | 0.072 | 1.1 | 0.184 |
|  | 3 | -0.049 | 0.07 | 0.953 | 0.489 |
|  | 4 | -0.144 | 0.083 | 0.866 | 0.084 |
|  | 5 | 0.016 | 0.034 | 1.016 | 0.644 |
|  | 6 | 0.08 | 0.073 | 1.084 | 0.270 |
|  | 7 | 0.081 | 0.132 | 1.084 | 0.540 |
|  | 8 | -0.002 | 0.083 | 0.998 | 0.985 |
| Unemployed% | 1 | 0.051 | 0.111 | 1.052 | 0.649 |
|  | 2 | 0.013 | 0.103 | 1.013 | 0.899 |
|  | 3 | -0.166 | 0.102 | 0.847 | 0.103 |
|  | 4 | 0.116 | 0.084 | 1.123 | 0.165 |
|  | 5 | 0.065 | 0.044 | 1.067 | 0.139 |
|  | 6 | 0.03 | 0.103 | 1.03 | 0.772 |
|  | 7 | -0.127 | 0.177 | 0.881 | 0.474 |
|  | 8 | -0.121 | 0.127 | 0.886 | 0.339 |
| Income Rate | 1 | 0.127 | 0.237 | 1.135 | 0.592 |
|  | 2 | 0.142 | 0.217 | 1.153 | 0.512 |
|  | 3 | 0.108 | 0.204 | 1.115 | 0.595 |
|  | 4 | -0.018 | 0.235 | 0.982 | 0.938 |
|  | 5 | 0.047 | 0.104 | 1.049 | 0.647 |
|  | 6 | -0.011 | 0.217 | 0.989 | 0.958 |
|  | 7 | -1.068 | 0.416 | 0.344 | **0.010** |
|  | 8 | 0.014 | 0.266 | 1.015 | 0.957 |
| Uninsured% | 1 | 0.04 | 0.038 | 1.041 | 0.296 |
|  | 2 | 0.084 | 0.036 | 1.088 | **0.018** |
|  | 3 | 0.059 | 0.033 | 1.061 | 0.076 |
|  | 4 | 0.005 | 0.041 | 1.005 | 0.911 |
|  | 5 | 0.052 | 0.016 | 1.053 | **0.001** |
|  | 6 | 0.01 | 0.038 | 1.01 | 0.795 |
|  | 7 | 0.034 | 0.051 | 1.035 | 0.508 |
|  | 8 | 0.034 | 0.041 | 1.035 | 0.411 |
| Food insecurity | 1 | -0.061 | 0.06 | 0.941 | 0.313 |
|  | 2 | 0.021 | 0.057 | 1.022 | 0.708 |
|  | 3 | 0.007 | 0.052 | 1.007 | 0.901 |
|  | 4 | 0.137 | 0.062 | 1.147 | **0.027** |
|  | 5 | -0.146 | 0.026 | 0.864 | **<0.001** |
|  | 6 | -0.013 | 0.06 | 0.987 | 0.828 |
|  | 7 | 0.033 | 0.087 | 1.034 | 0.704 |
|  | 8 | 0.05 | 0.064 | 1.051 | 0.439 |
| Fair/Poor health | 1 | -0.091 | 0.071 | 0.913 | 0.202 |
|  | 2 | -0.207 | 0.072 | 0.813 | **0.004** |
|  | 3 | 0.044 | 0.055 | 1.045 | 0.429 |
|  | 4 | -0.016 | 0.075 | 0.984 | 0.829 |
|  | 5 | -0.086 | 0.029 | 0.918 | **0.003** |
|  | 6 | -0.236 | 0.075 | 0.79 | **0.002** |
|  | 7 | -0.016 | 0.099 | 0.984 | 0.873 |
|  | 8 | -0.006 | 0.076 | 0.994 | 0.940 |
| **Environmental** | Population density | 1 | 0.01 | 0.003 | 1.01 | **0.004** |
|  | 2 | 0.017 | 0.002 | 1.017 | **<0.001** |
|  | 3 | 0.015 | 0.002 | 1.015 | **<0.001** |
|  | 4 | 0.001 | 0.005 | 1.001 | 0.806 |
|  | 5 | 0.02 | 0.002 | 1.02 | **<0.001** |
|  | 6 | 0.015 | 0.002 | 1.015 | **<0.001** |
|  | 7 | -0.021 | 0.015 | 0.979 | 0.150 |
|  | 8 | 0.007 | 0.005 | 1.007 | 0.146 |
| AQI | 1 | 0.113 | 0.219 | 1.12 | 0.605 |
|  | 2 | -0.084 | 0.116 | 0.919 | 0.470 |
|  | 3 | 0.048 | 0.171 | 1.049 | 0.780 |
|  | 4 | 0.233 | 0.236 | 1.263 | 0.323 |
|  | 5 | 0.561 | 0.136 | 1.752 | **<0.001** |
|  | 6 | 0.033 | 0.144 | 1.034 | 0.818 |
|  | 7 | -0.221 | 0.053 | 0.802 | **<0.001** |
|  | 8 | 0.076 | 0.04 | 1.079 | 0.059 |
| Temperature | 1 | 0.033 | 0.026 | 1.034 | 0.198 |
|  | 2 | -0.025 | 0.024 | 0.975 | 0.303 |
|  | 3 | -0.012 | 0.023 | 0.988 | 0.594 |
|  | 4 | -0.069 | 0.028 | 0.933 | **0.013** |
|  | 5 | -0.006 | 0.012 | 0.994 | 0.607 |
|  | 6 | 0.02 | 0.024 | 1.021 | 0.389 |
|  | 7 | 0.072 | 0.042 | 1.075 | 0.086 |
|  | 8 | -0.045 | 0.032 | 0.956 | 0.160 |
| PM | 1 | -0.307 | 0.825 | 0.736 | 0.710 |
|  | 2 | 0.515 | 0.4 | 1.674 | 0.198 |
|  | 3 | 0.039 | 0.632 | 1.04 | 0.950 |
|  | 4 | -0.737 | 0.9 | 0.478 | 0.413 |
|  | 5 | -1.94 | 0.526 | 0.144 | **<0.001** |
|  | 6 | 0.057 | 0.524 | 1.059 | 0.913 |
|  | 7 | 0.491 | 0.028 | 1.635 | **<0.001** |
|  | 8 | -0.385 | 0.132 | 0.68 | **0.004** |

**Table S11.** **2nd wave (Jun 4 to Sep 2, 2020, USA):** results from multinomial logit model for all clusters. The estimated odds ratios (ORs) show the association of each risk factor with increasing/decreasing the relative log odds of being in each cluster compare to cluster 0 (MIR=0)

|  | Variable | Cluster | Est. | SD | OR | P-value |
| --- | --- | --- | --- | --- | --- | --- |
| **Comorbidities & Disorders** | CVD | 1 | -0.064 | 0.090 | 0.938 | 0.476 |
|  | 2 | -0.074 | 0.060 | 0.928 | 0.214 |
|  | 3 | -0.121 | 0.095 | 0.886 | 0.205 |
|  | 4 | -0.003 | 0.077 | 0.997 | 0.964 |
|  | 5 | 0.016 | 0.088 | 1.017 | 0.852 |
| Cardiomyopathy & myocarditis | 1 | 0.024 | 0.140 | 1.024 | 0.866 |
|  | 2 | 0.017 | 0.088 | 1.017 | 0.849 |
|  | 3 | 0.109 | 0.134 | 1.115 | 0.418 |
|  | 4 | -0.138 | 0.123 | 0.871 | 0.263 |
|  | 5 | -0.058 | 0.151 | 0.944 | 0.702 |
| Hypertensive heart disease | 1 | 0.008 | 0.102 | 1.008 | 0.936 |
|  | 2 | 0.075 | 0.065 | 1.078 | 0.244 |
|  | 3 | 0.174 | 0.099 | 1.191 | 0.079 |
|  | 4 | -0.028 | 0.085 | 0.972 | 0.741 |
|  | 5 | -0.017 | 0.098 | 0.983 | 0.864 |
| Peripheral vascular disease | 1 | 0.403 | 0.430 | 1.496 | 0.349 |
|  | 2 | -0.237 | 0.312 | 0.789 | 0.447 |
|  | 3 | 0.518 | 0.422 | 1.678 | 0.220 |
|  | 4 | 0.510 | 0.383 | 1.665 | 0.183 |
|  | 5 | 0.087 | 0.533 | 1.090 | 0.871 |
| Atrial fibrillation | 1 | -0.042 | 0.211 | 0.959 | 0.842 |
|  | 2 | 0.010 | 0.116 | 1.010 | 0.929 |
|  | 3 | 0.076 | 0.191 | 1.079 | 0.690 |
|  | 4 | -0.092 | 0.167 | 0.912 | 0.581 |
|  | 5 | -0.364 | 0.235 | 0.695 | 0.121 |
| Cerebrovascular | 1 | 0.121 | 0.095 | 1.129 | 0.204 |
|  | 2 | 0.111 | 0.064 | 1.117 | 0.085 |
|  | 3 | 0.169 | 0.102 | 1.184 | 0.100 |
|  | 4 | 0.027 | 0.084 | 1.027 | 0.747 |
|  | 5 | 0.007 | 0.096 | 1.007 | 0.945 |
| Diabetes | 1 | 0.101 | 0.064 | 1.107 | 0.114 |
|  | **2** | **0.082** | **0.039** | **1.085** | **0.034** |
|  | 3 | 0.059 | 0.057 | 1.061 | 0.303 |
|  | 4 | 0.062 | 0.052 | 1.064 | 0.238 |
|  | 5 | 0.010 | 0.077 | 1.010 | 0.892 |
| Hepatitis | **1** | **2.572** | **0.512** | **13.093** | **<0.001** |
|  | **2** | **3.973** | **0.789** | **53.122** | **<0.001** |
|  | 3 | -0.394 | 0.367 | 0.674 | 0.282 |
|  | **4** | **-1.467** | **0.341** | **0.231** | **<0.001** |
|  | **5** | **2.630** | **0.403** | **13.876** | **<0.001** |
| HIV/AIDS | **1** | **0.831** | **0.336** | **2.295** | **0.013** |
|  | 2 | 0.584 | 0.327 | 1.794 | 0.074 |
|  | **3** | **1.056** | **0.332** | **2.875** | **0.001** |
|  | 4 | 0.652 | 0.358 | 1.920 | 0.068 |
|  | **5** | **0.778** | **0.344** | **2.177** | **0.024** |
| Tuberculosis | **1** | **0.762** | **0.288** | **2.143** | **0.008** |
|  | **2** | **3.795** | **1.131** | **44.472** | **0.001** |
|  | **3** | **-1.512** | **0.379** | **0.220** | **<0.001** |
|  | 4 | 0.393 | 0.318 | 1.482 | 0.216 |
|  | **5** | **0.566** | **0.255** | **1.760** | **0.026** |
| Asthma | 1 | -1.542 | 0.951 | 0.214 | 0.105 |
|  | **2** | **-1.179** | **0.575** | **0.308** | **0.040** |
|  | **3** | **-2.284** | **0.798** | **0.102** | **0.004** |
|  | 4 | 0.772 | 0.731 | 2.164 | 0.291 |
|  | 5 | -0.563 | 0.944 | 0.570 | 0.551 |
| Lower respiratory infection | 1 | -0.021 | 0.031 | 0.979 | 0.504 |
|  | 2 | -0.019 | 0.015 | 0.981 | 0.215 |
|  | 3 | 0.016 | 0.024 | 1.016 | 0.514 |
|  | 4 | 0.015 | 0.020 | 1.015 | 0.463 |
|  | 5 | -0.031 | 0.034 | 0.970 | 0.368 |
| Ischemia | 1 | 0.057 | 0.089 | 1.059 | 0.520 |
|  | 2 | 0.064 | 0.059 | 1.066 | 0.281 |
|  | 3 | 0.112 | 0.095 | 1.119 | 0.237 |
|  | 4 | -0.009 | 0.077 | 0.991 | 0.907 |
|  | 5 | -0.018 | 0.087 | 0.982 | 0.836 |
| Mesothelioma | 1 | -0.310 | 0.985 | 0.733 | 0.753 |
|  | 2 | 0.335 | 0.561 | 1.399 | 0.550 |
|  | 3 | -0.329 | 1.062 | 0.720 | 0.757 |
|  | 4 | -0.188 | 0.923 | 0.829 | 0.839 |
|  | 5 | -1.273 | 0.655 | 0.280 | 0.052 |
| Tracheal cancer | 1 | 0.003 | 0.027 | 1.003 | 0.920 |
|  | 2 | 0.024 | 0.014 | 1.025 | 0.092 |
|  | 3 | -0.018 | 0.023 | 0.982 | 0.436 |
|  | 4 | -0.002 | 0.021 | 0.998 | 0.934 |
|  | 5 | -0.031 | 0.030 | 0.969 | 0.300 |
| Pancreatic cancer | 1 | -0.285 | 0.268 | 0.752 | 0.288 |
|  | 2 | -0.143 | 0.145 | 0.867 | 0.325 |
|  | 3 | 0.064 | 0.217 | 1.066 | 0.770 |
|  | 4 | 0.193 | 0.200 | 1.213 | 0.334 |
|  | 5 | 0.176 | 0.285 | 1.192 | 0.537 |
| Rheumatic disease | 1 | 0.716 | 0.421 | 2.045 | 0.089 |
|  | 2 | 0.264 | 0.267 | 1.303 | 0.322 |
|  | **3** | **0.900** | **0.350** | **2.459** | **0.010** |
|  | 4 | -0.013 | 0.352 | 0.987 | 0.971 |
|  |  | 5 | 0.066 | 0.511 | 1.068 | 0.898 |
| **Demographics & Social** | Age | **1** | **-0.128** | **0.054** | **0.880** | **0.019** |
|  | **2** | **-0.202** | **0.034** | **0.817** | **<0.001** |
|  | 3 | -0.022 | 0.050 | 0.978 | 0.656 |
|  | **4** | **-0.124** | **0.047** | **0.883** | **0.008** |
|  | **5** | **-0.164** | **0.068** | **0.849** | **0.016** |
| Female-AA% | 1 | -0.660 | 0.381 | 0.517 | 0.083 |
|  | **2** | **4.616** | **0.655** | **101.137** | **<0.001** |
|  | **3** | **-0.896** | **0.359** | **0.408** | **0.012** |
|  | **4** | **-1.674** | **0.383** | **0.188** | **<0.001** |
|  | **5** | **-2.538** | **0.314** | **0.079** | **<0.001** |
| Female-WA% | 1 | -0.298 | 0.536 | 0.743 | 0.578 |
|  | **2** | **-2.848** | **0.541** | **0.058** | **<0.001** |
|  | 3 | 0.424 | 0.502 | 1.528 | 0.398 |
|  | 4 | -0.471 | 0.538 | 0.624 | 0.381 |
|  | 5 | 0.435 | 0.564 | 1.545 | 0.441 |
| Male-AA% | 1 | -0.388 | 0.355 | 0.678 | 0.274 |
|  | 2 | -0.670 | 0.717 | 0.512 | 0.350 |
|  | **3** | **1.074** | **0.342** | **2.927** | **0.002** |
|  | **4** | **-1.698** | **0.370** | **0.183** | **<0.001** |
|  | **5** | **-1.438** | **0.291** | **0.237** | **<0.001** |
| Male-WA% | 1 | -0.622 | 0.506 | 0.537 | 0.219 |
|  | **2** | **1.836** | **0.490** | **6.268** | **<0.001** |
|  | **3** | **-1.309** | **0.477** | **0.270** | **0.006** |
|  | 4 | -0.575 | 0.515 | 0.562 | 0.264 |
|  | 5 | -0.569 | 0.517 | 0.566 | 0.271 |
| Asian% | 1 | -0.142 | 0.347 | 0.868 | 0.683 |
|  | 2 | -0.030 | 0.180 | 0.970 | 0.866 |
|  | 3 | 0.109 | 0.247 | 1.115 | 0.660 |
|  | 4 | -0.010 | 0.254 | 0.990 | 0.967 |
|  | 5 | 0.027 | 0.335 | 1.027 | 0.936 |
| Smokers% | 1 | -0.253 | 0.155 | 0.777 | 0.102 |
|  | 2 | 0.066 | 0.080 | 1.068 | 0.406 |
|  | 3 | -0.145 | 0.126 | 0.865 | 0.248 |
|  | 4 | -0.141 | 0.115 | 0.868 | 0.220 |
|  | 5 | 0.286 | 0.156 | 1.331 | 0.066 |
| Unemployed% | **1** | **0.422** | **0.144** | **1.525** | **0.003** |
|  | **2** | **0.292** | **0.099** | **1.339** | **0.003** |
|  | 3 | 0.110 | 0.154 | 1.116 | 0.475 |
|  | **4** | **0.461** | **0.124** | **1.585** | **<0.001** |
|  | **5** | **0.427** | **0.175** | **1.532** | **0.015** |
| Income Rate | 1 | 0.375 | 0.341 | 1.456 | 0.271 |
|  | 2 | 0.196 | 0.196 | 1.216 | 0.319 |
|  | 3 | 0.295 | 0.274 | 1.343 | 0.281 |
|  | 4 | 0.085 | 0.273 | 1.089 | 0.755 |
|  | 5 | 0.216 | 0.394 | 1.241 | 0.584 |
| Uninsured% | 1 | 0.055 | 0.055 | 1.056 | 0.319 |
|  | 2 | 0.002 | 0.029 | 1.002 | 0.954 |
|  | 3 | 0.060 | 0.046 | 1.062 | 0.193 |
|  | 4 | 0.012 | 0.043 | 1.012 | 0.783 |
|  | 5 | 0.103 | 0.064 | 1.108 | 0.109 |
| Food insecurity | 1 | 0.037 | 0.086 | 1.038 | 0.667 |
|  | **2** | **-0.098** | **0.050** | **0.907** | **0.048** |
|  | 3 | 0.082 | 0.078 | 1.085 | 0.297 |
|  | 4 | -0.038 | 0.069 | 0.963 | 0.583 |
|  | 5 | 0.085 | 0.099 | 1.089 | 0.389 |
| Fair/Poor health | 1 | -0.017 | 0.102 | 0.983 | 0.869 |
|  | 2 | -0.062 | 0.058 | 0.940 | 0.287 |
|  | 3 | 0.118 | 0.087 | 1.125 | 0.178 |
|  | 4 | 0.038 | 0.081 | 1.038 | 0.641 |
|  | 5 | -0.240 | 0.130 | 0.787 | 0.064 |
| **Environmental** | Population density | 1 | 0.010 | 0.005 | 1.010 | 0.064 |
|  | **2** | **0.015** | **0.004** | **1.015** | **0.001** |
|  | **3** | **0.011** | **0.005** | **1.011** | **0.029** |
|  | **4** | **0.010** | **0.005** | **1.011** | **0.040** |
|  | **5** | **0.011** | **0.006** | **1.011** | **0.050** |
| AQI | 1 | 0.004 | 0.108 | 1.004 | 0.973 |
|  | 2 | -0.010 | 0.142 | 0.990 | 0.943 |
|  | **3** | **-0.816** | **0.198** | **0.442** | **<0.001** |
|  | 4 | 0.233 | 0.341 | 1.262 | 0.495 |
|  | 5 | 0.387 | 0.342 | 1.473 | 0.258 |
| Temperature | **1** | **0.159** | **0.044** | **1.172** | **<0.001** |
|  | **2** | **0.070** | **0.029** | **1.072** | **0.015** |
|  | **3** | **0.090** | **0.044** | **1.095** | **0.039** |
|  | **4** | **0.111** | **0.039** | **1.118** | **0.005** |
|  | 5 | -0.028 | 0.058 | 0.972 | 0.627 |
| PM | 1 | -0.137 | 0.370 | 0.872 | 0.711 |
|  | 2 | -0.103 | 0.477 | 0.902 | 0.829 |
|  | **3** | **2.461** | **0.615** | **11.715** | **<0.001** |
|  | 4 | -0.993 | 1.248 | 0.370 | 0.426 |
|  | 5 | -1.238 | 1.177 | 0.290 | 0.293 |

**Table S12.** **3rd wave (Sep 3 - Nov 12, 2020, USA):** results from multinomial logit model for all clusters. The estimated odds ratios (ORs) show the association of each risk factor with increasing/decreasing the relative log odds of being in each cluster compare to cluster 0 (MIR=0)

|  | **Variable** | **Cluster** | **Est.** | **SD** | **OR** | **P-value** |
| --- | --- | --- | --- | --- | --- | --- |
| **Comorbidities & Disorders** | CVD | 1 | -0.074 | 0.051 | 0.928 | 0.148 |
|  | 2 | 0.010 | 0.064 | 1.010 | 0.872 |
|  | 3 | 0.168 | 0.091 | 1.183 | 0.067 |
|  | 4 | -0.041 | 0.038 | 0.960 | 0.289 |
| Cardiomyopathy & myocarditis | **1** | **0.241** | **0.114** | **1.272** | **0.034** |
|  | 2 | -0.075 | 0.174 | 0.928 | 0.667 |
|  | 3 | -0.097 | 0.225 | 0.908 | 0.668 |
|  | **4** | **0.194** | **0.099** | **1.214** | **0.049** |
| Hypertensive heart disease | 1 | 0.110 | 0.059 | 1.117 | 0.062 |
|  | 2 | -0.042 | 0.089 | 0.959 | 0.637 |
|  | 3 | -0.150 | 0.139 | 0.861 | 0.279 |
|  | 4 | 0.050 | 0.047 | 1.051 | 0.290 |
| Peripheral vascular disease | 1 | 0.261 | 0.376 | 1.299 | 0.487 |
|  | 2 | 0.137 | 0.483 | 1.147 | 0.776 |
|  | 3 | 0.307 | 0.517 | 1.360 | 0.552 |
|  | 4 | -0.025 | 0.323 | 0.975 | 0.939 |
| Cerebrovascular | 1 | 0.091 | 0.058 | 1.095 | 0.116 |
|  | 2 | 0.038 | 0.071 | 1.039 | 0.594 |
|  | 3 | -0.107 | 0.097 | 0.898 | 0.268 |
|  | 4 | 0.066 | 0.044 | 1.068 | 0.132 |
| Diabetes | **1** | **0.144** | **0.060** | **1.155** | **0.016** |
|  | 2 | 0.038 | 0.083 | 1.038 | 0.649 |
|  | 3 | -0.234 | 0.155 | 0.791 | 0.130 |
|  | 4 | 0.093 | 0.048 | 1.098 | 0.053 |
| Hepatitis | **1** | **-0.604** | **0.030** | **0.547** | **<0.001** |
|  | **2** | **-1.967** | **0.018** | **0.140** | **<0.001** |
|  | **3** | **-0.565** | **0.023** | **0.568** | **<0.001** |
|  | **4** | **9.220** | **0.078** | **10099.235** | **<0.001** |
| HIV/AIDS | 1 | 0.103 | 0.429 | 1.109 | 0.809 |
|  | **2** | **1.376** | **0.403** | **3.961** | **0.001** |
|  | **3** | **4.367** | **0.217** | **78.823** | **<0.001** |
|  | 4 | -0.581 | 0.382 | 0.559 | 0.128 |
| Tuberculosis | **1** | **1.171** | **0.067** | **3.224** | **<0.001** |
|  | **2** | **3.513** | **0.319** | **33.554** | **<0.001** |
|  | **3** | **1.952** | **0.031** | **7.045** | **<0.001** |
|  | **4** | **3.446** | **0.314** | **31.373** | **<0.001** |
| Lower respiratory infection | 1 | 0.038 | 0.028 | 1.038 | 0.172 |
|  | **2** | **0.080** | **0.033** | **1.084** | **0.016** |
|  | **3** | **0.120** | **0.055** | **1.128** | **0.028** |
|  | 4 | 0.036 | 0.022 | 1.036 | 0.104 |
| Interstitial lung disease & pulmonary sarcoidosis | 1 | 0.231 | 0.208 | 1.260 | 0.268 |
|  | **2** | **-0.644** | **0.311** | **0.525** | **0.038** |
|  | 3 | 0.105 | 0.448 | 1.111 | 0.814 |
|  | 4 | -0.101 | 0.170 | 0.904 | 0.551 |
| Asthma | 1 | -0.332 | 0.695 | 0.718 | 0.633 |
|  | 2 | 0.193 | 0.926 | 1.212 | 0.835 |
|  | **3** | **-0.866** | **0.281** | **0.421** | **0.002** |
|  | 4 | -0.139 | 0.539 | 0.870 | 0.796 |
| COPD | 1 | 0.009 | 0.020 | 1.009 | 0.660 |
|  | 2 | 0.018 | 0.027 | 1.018 | 0.502 |
|  | 3 | -0.017 | 0.051 | 0.983 | 0.733 |
|  | 4 | -0.013 | 0.016 | 0.987 | 0.415 |
| Ischemia | 1 | 0.096 | 0.051 | 1.100 | 0.059 |
|  | 2 | 0.019 | 0.064 | 1.019 | 0.769 |
|  | 3 | -0.168 | 0.093 | 0.846 | 0.071 |
|  | 4 | 0.046 | 0.038 | 1.047 | 0.231 |
| Mesothelioma | **1** | **2.234** | **0.410** | **9.334** | **<0.001** |
|  | **2** | **3.021** | **0.427** | **20.506** | **<0.001** |
|  | **3** | **1.291** | **0.073** | **3.637** | **<0.001** |
|  | **4** | **2.168** | **0.299** | **8.743** | **<0.001** |
| Tracheal cancer | **1** | **-0.071** | **0.027** | **0.932** | **0.008** |
|  | 2 | -0.022 | 0.035 | 0.978 | 0.532 |
|  | 3 | -0.068 | 0.066 | 0.934 | 0.303 |
|  | 4 | -0.022 | 0.022 | 0.978 | 0.306 |
| Leukemia | 1 | -0.065 | 0.331 | 0.937 | 0.844 |
|  | 2 | -0.008 | 0.424 | 0.992 | 0.985 |
|  | 3 | 0.211 | 0.819 | 1.235 | 0.796 |
|  | 4 | 0.241 | 0.270 | 1.273 | 0.372 |
| Pancreatic cancer | 1 | 0.509 | 0.289 | 1.664 | 0.078 |
|  | 2 | -0.188 | 0.387 | 0.828 | 0.626 |
|  | 3 | -0.052 | 0.678 | 0.949 | 0.939 |
|  | 4 | 0.101 | 0.242 | 1.107 | 0.675 |
| Drug use disorder | 1 | -0.061 | 0.066 | 0.941 | 0.354 |
|  | **2** | **-0.293** | **0.108** | **0.746** | **0.007** |
|  | 3 | 0.141 | 0.133 | 1.152 | 0.287 |
|  | 4 | -0.066 | 0.058 | 0.936 | 0.257 |
| Alcohol use disorder | **1** | **-0.436** | **0.174** | **0.647** | **0.012** |
|  | 2 | -0.081 | 0.140 | 0.922 | 0.561 |
|  | 3 | -0.753 | 0.438 | 0.471 | 0.086 |
|  | 4 | -0.200 | 0.118 | 0.818 | 0.088 |
| **Demographics & Social** | Female-AA% | **1** | **3.509** | **0.105** | **33.431** | **<0.001** |
|  | **2** | **-2.986** | **0.031** | **0.050** | **<0.001** |
|  | **3** | **-0.867** | **0.022** | **0.420** | **<0.001** |
|  | **4** | **3.132** | **0.123** | **22.921** | **<0.001** |
| Female-WA% | **1** | **-3.626** | **0.402** | **0.027** | **<0.001** |
|  | **2** | **-3.931** | **0.147** | **0.020** | **<0.001** |
|  | **3** | **-2.150** | **0.059** | **0.117** | **<0.001** |
|  | **4** | **-7.248** | **0.777** | **0.001** | **<0.001** |
| Male-AA% | **1** | **-2.008** | **0.100** | **0.134** | **<0.001** |
|  | **2** | **-2.479** | **0.038** | **0.084** | **<0.001** |
|  | **3** | **-2.453** | **0.029** | **0.086** | **<0.001** |
|  | **4** | **0.257** | **0.123** | **1.293** | **0.037** |
| Smokers% | **1** | **0.257** | **0.125** | **1.293** | **0.040** |
|  | 2 | -0.043 | 0.162 | 0.958 | 0.792 |
|  | 3 | -0.035 | 0.310 | 0.965 | 0.909 |
|  | 4 | 0.143 | 0.102 | 1.154 | 0.160 |
| Unemployed% | 1 | 0.109 | 0.154 | 1.115 | 0.479 |
|  | 2 | 0.209 | 0.193 | 1.233 | 0.278 |
|  | 3 | -0.122 | 0.362 | 0.885 | 0.736 |
|  | 4 | -0.162 | 0.125 | 0.850 | 0.196 |
| Income Rate | 1 | 0.326 | 0.308 | 1.386 | 0.289 |
|  | 2 | 0.229 | 0.336 | 1.257 | 0.497 |
|  | 3 | -1.310 | 0.806 | 0.270 | 0.104 |
|  | 4 | -0.210 | 0.236 | 0.811 | 0.374 |
| Uninsured% | 1 | 0.011 | 0.066 | 1.011 | 0.863 |
|  | 2 | -0.098 | 0.085 | 0.907 | 0.252 |
|  | 3 | 0.062 | 0.153 | 1.064 | 0.683 |
|  | 4 | -0.074 | 0.051 | 0.929 | 0.147 |
| Food insecurity | **1** | **-0.217** | **0.096** | **0.805** | **0.024** |
|  | 2 | -0.174 | 0.107 | 0.840 | 0.103 |
|  | 3 | 0.063 | 0.214 | 1.065 | 0.769 |
|  | 4 | -0.116 | 0.073 | 0.890 | 0.110 |
| Fair/Poor health | 1 | -0.200 | 0.129 | 0.819 | 0.121 |
|  | 2 | 0.108 | 0.166 | 1.114 | 0.514 |
|  | 3 | 0.199 | 0.299 | 1.221 | 0.504 |
|  | 4 | 0.010 | 0.101 | 1.010 | 0.923 |
| **Environmental** | Population density | **1** | **0.016** | **0.006** | **1.017** | **0.011** |
|  | 2 | 0.015 | 0.008 | 1.015 | 0.055 |
|  | 3 | 0.013 | 0.008 | 1.013 | 0.120 |
|  | **4** | **0.016** | **0.006** | **1.016** | **0.014** |
| AQI | 1 | 0.466 | 0.256 | 1.593 | 0.069 |
|  | **2** | **-0.329** | **0.160** | **0.720** | **0.040** |
|  | 3 | 0.119 | 0.073 | 1.127 | 0.104 |
|  | **4** | **0.320** | **0.112** | **1.378** | **0.004** |
| Temperature | 1 | 0.026 | 0.045 | 1.026 | 0.562 |
|  | 2 | -0.015 | 0.054 | 0.985 | 0.783 |
|  | **3** | **-0.252** | **0.108** | **0.777** | **0.020** |
|  | 4 | -0.056 | 0.036 | 0.946 | 0.117 |
| PM | 1 | -1.764 | 0.983 | 0.171 | 0.073 |
|  | 2 | 0.943 | 0.523 | 2.569 | 0.071 |
|  | **3** | **-0.558** | **0.053** | **0.572** | **<0.001** |
|  | **4** | **-1.052** | **0.386** | **0.349** | **0.006** |
|  |  |  |  |  |  |  |

**REFERENCES**

[1] Huang C, Wang Y, Li X, Ren L, Zhao J, Hu Y, et al. Clinical features of patients infected with 2019 novel coronavirus in Wuhan, China. The lancet. 2020;395(10223):497-506.

[2] Halpin DM, Faner R, Sibila O, Badia JR, Agusti A. Do chronic respiratory diseases or their treatment affect the risk of SARS-CoV-2 infection? The Lancet Respiratory Medicine. 2020;8(5):436-8.

[3] Onder G, Rezza G, Brusaferro S. Case-fatality rate and characteristics of patients dying in relation to COVID-19 in Italy. Jama. 2020;323(18):1775-6.

[4] Covid C, COVID C, COVID C, Chow N, Fleming-Dutra K, Gierke R, et al. Preliminary estimates of the prevalence of selected underlying health conditions among patients with coronavirus disease 2019—United States, February 12–March 28, 2020. Morbidity and Mortality Weekly Report. 2020;69(13):382.

[5] Organization WH. Coronavirus disease 2019 (COVID-19): situation report, 73. 2020.

[6] Zhao Q, Meng M, Kumar R, Wu Y, Huang J, Lian N, et al. The impact of COPD and smoking history on the severity of Covid‐19: A systemic review and meta‐analysis. Journal of medical virology. 2020.

[7] Guan W-j, Ni Z-y, Hu Y, Liang W-h, Ou C-q, He J-x, et al. Clinical characteristics of coronavirus disease 2019 in China. New England journal of medicine. 2020;382(18):1708-20.

[8] Alqahtani JS, Oyelade T, Aldhahir AM, Alghamdi SM, Almehmadi M, Alqahtani AS, et al. Prevalence, severity and mortality associated with COPD and smoking in patients with COVID-19: a rapid systematic review and meta-analysis. PloS one. 2020;15(5):e0233147.

[9] Brake SJ, Barnsley K, Lu W, McAlinden KD, Eapen MS, Sohal SS. Smoking upregulates angiotensin-converting enzyme-2 receptor: a potential adhesion site for novel coronavirus SARS-CoV-2 (Covid-19). Multidisciplinary Digital Publishing Institute; 2020.

[10] Zhao Y, Zhao Z, Wang Y, Zhou Y, Ma Y, Zuo W. Single-cell RNA expression profiling of ACE2, the putative receptor of Wuhan 2019-nCov. BioRxiv. 2020.

[11] Bhat TA, Panzica L, Kalathil SG, Thanavala Y. Immune dysfunction in patients with chronic obstructive pulmonary disease. Annals of the American Thoracic Society. 2015;12(Supplement 2):S169-S75.

[12] Hendren NS, Drazner MH, Bozkurt B, Cooper J, Leslie T. Description and proposed management of the acute COVID-19 cardiovascular syndrome. Circulation. 2020.

[13] Shi S, Qin M, Shen B, Cai Y, Liu T, Yang F, et al. Association of cardiac injury with mortality in hospitalized patients with COVID-19 in Wuhan, China. JAMA cardiology. 2020.

[14] Lippi G, Lavie CJ, Sanchis-Gomar F. Cardiac troponin I in patients with coronavirus disease 2019 (COVID-19): Evidence from a meta-analysis. Progress in cardiovascular diseases. 2020.

[15] Hamming I, Timens W, Bulthuis M, Lely A, Navis G, van Goor H. Tissue distribution of ACE2 protein, the functional receptor for SARS coronavirus. A first step in understanding SARS pathogenesis. The Journal of Pathology: A Journal of the Pathological Society of Great Britain and Ireland. 2004;203(2):631-7.

[16] Crackower MA, Sarao R, Oudit GY, Yagil C, Kozieradzki I, Scanga SE, et al. Angiotensin-converting enzyme 2 is an essential regulator of heart function. Nature. 2002;417(6891):822-8.

[17] Chen L, Li X, Chen M, Feng Y, Xiong C. The ACE2 expression in human heart indicates new potential mechanism of heart injury among patients infected with SARS-CoV-2. Cardiovascular research. 2020;116(6):1097-100.

[18] Tang N, Li D, Wang X, Sun Z. Abnormal coagulation parameters are associated with poor prognosis in patients with novel coronavirus pneumonia. Journal of Thrombosis and Haemostasis. 2020;18(4):844-7.

[19] Danzi G, Loffi M, Galeazzi G, Gherbesi E. Acute pulmonary embolism and COVID-19 pneumonia: a random association?[published online ahead of print March 30, 2020]. Eur Heart J.

[20] Ammirati E, Cipriani M, Moro C, Raineri C, Pini D, Sormani P, et al. Clinical Presentation and Outcome in a Contemporary Cohort of Patients With Acute Myocarditis: Multicenter Lombardy Registry. Circulation. 2018;138(11):1088-99.

[21] Hufnagel G, Pankuweit S, Richter A, Schönian U, Maisch B, Investigators E. The European Study of Epidemiology and Treatment of Cardiac Inflammatory Diseases (ESETCID) First Epidemiological Results. Herz. 2000;25(3):279-85.

[22] Li W, Moore MJ, Vasilieva N, Sui J, Wong SK, Berne MA, et al. Angiotensin-converting enzyme 2 is a functional receptor for the SARS coronavirus. Nature. 2003;426(6965):450-4.

[23] Zhou G, Zhao J, Wang S. Pathological study of impact of SARS coronavirus on heart and its conduction system in SARS patients. Medical Journal of Chinese People's Liberation Army. 1982(01).

[24] Oudit G, Kassiri Z, Jiang C, Liu P, Poutanen S, Penninger J, et al. SARS‐coronavirus modulation of myocardial ACE2 expression and inflammation in patients with SARS. European journal of clinical investigation. 2009;39(7):618-25.

[25] Booth CM, Matukas LM, Tomlinson GA, Rachlis AR, Rose DB, Dwosh HA, et al. Clinical features and short-term outcomes of 144 patients with SARS in the greater Toronto area. Jama. 2003;289(21):2801-9.

[26] Li B, Yang J, Zhao F, Zhi L, Wang X, Liu L, et al. Prevalence and impact of cardiovascular metabolic diseases on COVID-19 in China. Clinical Research in Cardiology. 2020:1-8.

[27] South AM, Diz DI, Chappell MC. COVID-19, ACE2, and the cardiovascular consequences. American Journal of Physiology-Heart and Circulatory Physiology. 2020;318(5):H1084-H90.

[28] Gupta R, Ghosh A, Singh AK, Misra A. Clinical considerations for patients with diabetes in times of COVID-19 epidemic. Diabetes & metabolic syndrome. 2020;14(3):211.

[29] Yang J, Feng Y, Yuan M, Yuan S, Fu H, Wu B, et al. Plasma glucose levels and diabetes are independent predictors for mortality and morbidity in patients with SARS. Diabetic medicine. 2006;23(6):623-8.

[30] Schoen K, Horvat N, Guerreiro NF, de Castro I, de Giassi KS. Spectrum of clinical and radiographic findings in patients with diagnosis of H1N1 and correlation with clinical severity. BMC infectious diseases. 2019;19(1):1-8.

[31] Song Z, Xu Y, Bao L, Zhang L, Yu P, Qu Y, et al. From SARS to MERS, thrusting coronaviruses into the spotlight. Viruses. 2019;11(1):59.

[32] Jain V, Yuan J-M. Systematic review and meta-analysis of predictive symptoms and comorbidities for severe COVID-19 infection. medRxiv. 2020.

[33] Wu Z, McGoogan JM. Characteristics of and important lessons from the coronavirus disease 2019 (COVID-19) outbreak in China: summary of a report of 72 314 cases from the Chinese Center for Disease Control and Prevention. Jama. 2020;323(13):1239-42.

[34] Yang X, Yu Y, Xu J, Shu H, Liu H, Wu Y, et al. Clinical course and outcomes of critically ill patients with SARS-CoV-2 pneumonia in Wuhan, China: a single-centered, retrospective, observational study. The Lancet Respiratory Medicine. 2020.

[35] Pal R, Bhansali A. COVID-19, diabetes mellitus and ACE2: the conundrum. diabetes research and clinical practice. 2020;162.

[36] Geerlings SE, Hoepelman AI. Immune dysfunction in patients with diabetes mellitus (DM). FEMS Immunology & Medical Microbiology. 1999;26(3-4):259-65.

[37] Jafar N, Edriss H, Nugent K. The effect of short-term hyperglycemia on the innate immune system. The American journal of the medical sciences. 2016;351(2):201-11.

[38] Guo W, Li M, Dong Y, Zhou H, Zhang Z, Tian C, et al. Diabetes is a risk factor for the progression and prognosis of COVID‐19. Diabetes/metabolism research and reviews. 2020:e3319.

[39] Maddaloni E, Buzzetti R. Covid‐19 and diabetes mellitus: unveiling the interaction of two pandemics. Diabetes/Metabolism Research and Reviews. 2020:e33213321.

[40] Tikellis C, Thomas M. Angiotensin-converting enzyme 2 (ACE2) is a key modulator of the renin angiotensin system in health and disease. International journal of peptides. 2012;2012.

[41] Zou Z, Yan Y, Shu Y, Gao R, Sun Y, Li X, et al. Angiotensin-converting enzyme 2 protects from lethal avian influenza A H5N1 infections. Nature communications. 2014;5(1):1-7.

[42] Wu C, Chen X, Cai Y, Zhou X, Xu S, Huang H, et al. Risk factors associated with acute respiratory distress syndrome and death in patients with coronavirus disease 2019 pneumonia in Wuhan, China. JAMA internal medicine. 2020.

[43] Iacobellis G. COVID-19 and diabetes: can DPP4 inhibition play a role? diabetes research and clinical practice. 2020;162.

[44] Kulcsar KA, Coleman CM, Beck SE, Frieman MB. Comorbid diabetes results in immune dysregulation and enhanced disease severity following MERS-CoV infection. JCI insight. 2019;4(20).

[45] Li K, Wohlford-Lenane CL, Channappanavar R, Park J-E, Earnest JT, Bair TB, et al. Mouse-adapted MERS coronavirus causes lethal lung disease in human DPP4 knockin mice. Proceedings of the National Academy of Sciences. 2017;114(15):E3119-E28.

[46] Fan C, Wu X, Liu Q, Li Q, Liu S, Lu J, et al. A human DPP4-knockin mouse’s susceptibility to infection by authentic and pseudotyped MERS-CoV. Viruses. 2018;10(9):448.

[47] Conarello SL, Li Z, Ronan J, Roy RS, Zhu L, Jiang G, et al. Mice lacking dipeptidyl peptidase IV are protected against obesity and insulin resistance. Proceedings of the National Academy of Sciences. 2003;100(11):6825-30.

[48] Lippi G, Plebani M. Laboratory abnormalities in patients with COVID-2019 infection. Clinical Chemistry and Laboratory Medicine (CCLM). 2020;1(ahead-of-print).

[49] Fan Z, Chen L, Li J, Cheng X, Yang J, Tian C, et al. Clinical features of COVID-19-related liver damage. Clinical Gastroenterology and Hepatology. 2020.

[50] Chen N, Zhou M, Dong X, Qu J, Gong F, Han Y, et al. Epidemiological and clinical characteristics of 99 cases of 2019 novel coronavirus pneumonia in Wuhan, China: a descriptive study. The Lancet. 2020;395(10223):507-13.

[51] Hashimoto T, Perlot T, Rehman A, Trichereau J, Ishiguro H, Paolino M, et al. ACE2 links amino acid malnutrition to microbial ecology and intestinal inflammation. Nature. 2012;487(7408):477-81.

[52] Chai X, Hu L, Zhang Y, Han W, Lu Z, Ke A, et al. Specific ACE2 expression in cholangiocytes may cause liver damage after 2019-nCoV infection. BioRxiv. 2020.

[53] Ong J, Young BE, Ong S. COVID-19 in gastroenterology: a clinical perspective. Gut. 2020;69(6):1144-5.

[54] Muniyappa R, Gubbi S. COVID-19 pandemic, coronaviruses, and diabetes mellitus. American Journal of Physiology-Endocrinology and Metabolism. 2020;318(5):E736-E41.

[55] Richardson S, Hirsch JS, Narasimhan M, Crawford JM, McGinn T, Davidson KW, et al. Presenting characteristics, comorbidities, and outcomes among 5700 patients hospitalized with COVID-19 in the New York City area. Jama. 2020.

[56] Ferguson N, Laydon D, Nedjati Gilani G, Imai N, Ainslie K, Baguelin M, et al. Report 9: Impact of non-pharmaceutical interventions (NPIs) to reduce COVID19 mortality and healthcare demand. 2020.

[57] Wang D, Hu B, Hu C, Zhu F, Liu X, Zhang J, et al. Clinical characteristics of 138 hospitalized patients with 2019 novel coronavirus–infected pneumonia in Wuhan, China. Jama. 2020;323(11):1061-9.

[58] Stang A, Standl F, Jöckel K-H. Characteristics of COVID-19 pandemic and public health consequences. Herz. 2020:1.

[59] Standl F, Jöckel K-H, Stang A. COVID-19 and the need of targeted inverse quarantine. European Journal of Epidemiology. 2020:1-2.

[60] Dong Y, Mo X, Hu Y, Qi X, Jiang F, Jiang Z, et al. Epidemiology of COVID-19 among children in China. Pediatrics. 2020;145(6).

[61] Emami A, Javanmardi F, Pirbonyeh N, Akbari A. Prevalence of underlying diseases in hospitalized patients with COVID-19: a systematic review and meta-analysis. Archives of academic emergency medicine. 2020;8(1).

[62] Wenham C, Smith J, Morgan R. COVID-19: the gendered impacts of the outbreak. The Lancet. 2020;395(10227):846-8.

[63] Feng Z. The Novel Coronavirus Pneumonia Emergency Response Epidemiology Team. China CDC Weekly. 2020;2(8):113-22.

[64] Cai H. Sex difference and smoking predisposition in patients with COVID-19. The Lancet Respiratory Medicine. 2020;8(4):e20.

[65] Atto B, Eapen MS, Sharma P, Frey U, Ammit AJ, Markos J, et al. New therapeutic targets for the prevention of infectious acute exacerbations of COPD: role of epithelial adhesion molecules and inflammatory pathways. Clinical Science. 2019;133(14):1663-703.

[66] Lawrence H, Hunter A, Murray R, Lim W, McKeever T. Cigarette smoking and the occurrence of influenza–Systematic review. Journal of Infection. 2019;79(5):401-6.

[67] Eapen MS, Sharma P, Sohal SS. Mitochondrial dysfunction in macrophages: a key to defective bacterial phagocytosis in COPD. Eur Respiratory Soc; 2019.

[68] Sohal SS. Inhaled corticosteroids and increased microbial load in COPD: potential role of epithelial adhesion molecules. European Respiratory Journal. 2018;51(2):1702257.

[69] Zhi K, Wang L, Han Y, Vaughn MG, Qian Z, Chen Y, et al. Trends in cigarette smoking among older male adults in China: An urban–rural comparison. Journal of Applied Gerontology. 2019;38(6):884-901.

[70] Li F, Li W, Farzan M, Harrison SC. Structure of SARS coronavirus spike receptor-binding domain complexed with receptor. Science. 2005;309(5742):1864-8.

[71] Wang J, Luo Q, Chen R, Chen T, Li J. Susceptibility analysis of COVID-19 in smokers based on ACE2. 2020.

[72] Lippi G, Henry BM. Active smoking is not associated with severity of coronavirus disease 2019 (COVID-19). European journal of internal medicine. 2020.

[73] Wang J, Tang K, Feng K, Lv W. High temperature and high humidity reduce the transmission of COVID-19. Available at SSRN 3551767. 2020.

[74] Wang M, Jiang A, Gong L, Luo L, Guo W, Li C. Temperature Significantly Change COVID-19 Transmission in 429 cities. medRxiv. 2020.

[75] Zhu Y, Xie J. Association between ambient temperature and COVID-19 infection in 122 cities from China. Science of The Total Environment. 2020:138201.

[76] Wang M, Jiang A, Gong L, Luo L, Guo W, Li C, et al. Temperature significant change COVID-19 Transmission in 429 cities. MedRxiv. 2020.

[77] Bannister-Tyrrell M, Meyer A, Faverjon C, Cameron A. Preliminary evidence that higher temperatures are associated with lower incidence of COVID-19, for cases reported globally up to 29th February 2020. medRxiv. 2020.

[78] Qi H, Xiao S, Shi R, Ward MP, Chen Y, Tu W, et al. COVID-19 transmission in Mainland China is associated with temperature and humidity: A time-series analysis. Science of the Total Environment. 2020:138778.

[79] Jüni P, Rothenbühler M, Bobos P, Thorpe KE, da Costa BR, Fisman DN, et al. Impact of climate and public health interventions on the COVID-19 pandemic: a prospective cohort study. Cmaj. 2020;192(21):E566-E73.

[80] Sobur MA, Islam MS, Haque ME, Haque MT, Toniolo A, Rahman MT. Temperature and relative humidity are not major contributing factor on the occurrence of COVID-19 pandemic: An observational study in 57 countries. medRxiv. 2020.

[81] Wu X, Nethery RC, Sabath BM, Braun D, Dominici F. Exposure to air pollution and COVID-19 mortality in the United States. medRxiv. 2020.

[82] Morales KF, Paget J, Spreeuwenberg P. Possible explanations for why some countries were harder hit by the pandemic influenza virus in 2009–a global mortality impact modeling study. BMC infectious diseases. 2017;17(1):642.

[83] Clay K, Lewis J, Severnini E. What explains cross-city variation in mortality during the 1918 influenza pandemic? Evidence from 438 US cities. Economics & Human Biology. 2019;35:42-50.

[84] Clay K, Lewis J, Severnini E. Pollution, infectious disease, and mortality: evidence from the 1918 Spanish influenza pandemic. The Journal of Economic History. 2018;78(4):1179-209.

[85] Kaan PM, Hegele RG. Interaction between respiratory syncytial virus and particulate matter in guinea pig alveolar macrophages. American journal of respiratory cell and molecular biology. 2003;28(6):697-704.

[86] Lambert AL, Trasti FS, Mangum JB, Everitt JI. Effect of preexposure to ultrafine carbon black on respiratory syncytial virus infection in mice. Toxicological sciences. 2003;72(2):331-8.

[87] Ciencewicki J, Jaspers I. Air pollution and respiratory viral infection. Inhalation toxicology. 2007;19(14):1135-46.

[88] Ye Q, Fu J-f, Mao J-h, Shang S-q. Haze is a risk factor contributing to the rapid spread of respiratory syncytial virus in children. Environmental Science and Pollution Research. 2016;23(20):20178-85.

[89] Mollalo A, Vahedi B, Rivera KM. GIS-based spatial modeling of COVID-19 incidence rate in the continental United States. Science of The Total Environment. 2020:138884.

[90] Mollalo A, Rivera KM, Vahedi B. Artificial Neural Network Modeling of Novel Coronavirus (COVID-19) Incidence Rates across the Continental United States. International Journal of Environmental Research and Public Health. 2020;17(12):4204.

[91] Setti L, Passarini F, De Gennaro G, Barbieri P, Perrone MG, Piazzalunga A, et al. The potential role of particulate matter in the spreading of COVID-19 in Northern Italy: first evidence-based research hypotheses. medRxiv. 2020.

[92] Bontempi E. First data analysis about possible COVID-19 virus airborne diffusion due to air particulate matter (PM): the case of Lombardy (Italy). Environmental Research. 2020:109639.

[93] Fattorini D, Regoli F. Role of the chronic air pollution levels in the Covid-19 outbreak risk in Italy. Environmental Pollution. 2020:114732.

[94] Conticini E, Frediani B, Caro D. Can atmospheric pollution be considered a co-factor in extremely high level of SARS-CoV-2 lethality in Northern Italy? Environmental pollution. 2020:114465.

[95] Diggle P, Diggle PJ, Heagerty P, Liang K-Y, Heagerty PJ, Zeger S. Analysis of longitudinal data: Oxford University Press; 2002.

[96] Muthén L, Muthén B. Mplus. The comprehensive modelling program for applied researchers: user’s guide. 2016;5.

[97] Wang J, Wang X. Structural equation modeling: Applications using Mplus: John Wiley & Sons; 2019.

[98] Moran PA. Notes on continuous stochastic phenomena. Biometrika. 1950;37(1/2):17-23.

[99] McLachlan GJ. On bootstrapping the likelihood ratio test stastistic for the number of components in a normal mixture. Applied statistics. 1987:318-24.

[100] Nylund KL, Asparouhov T, Muthén BO. Deciding on the number of classes in latent class analysis and growth mixture modeling: A Monte Carlo simulation study. Structural equation modeling. 2007;14(4):535-69.

[101] Clark SL. Mixture* modeling with behavioral data: University of California, Los Angeles; 2010.
